# Supplementary material for: Simple small molecule carbon source strategy for synthesis of functional hydrothermal carbon: preparation of highly efficient uranium selective solid phase extractant
Source: Royal Society of Chemistry journal article supplement (doi:10.1039/c3ta13949b), 2013-11-07
Supplement: c3ta13949b.pdf [file c3ta13949b.pdf]

## Electronic Supplementary Information

### Simple Small Molecule Carbon Source Strategy for Synthesis of Functional Hydrothermal Carbon: Preparation of Highly Efficient Uranium Selective Solid Phase Extractant

Xiaodan Yang,<sup>a</sup> Juan Li,<sup>a</sup> Jun Liu,<sup>b</sup> Yin Tian,<sup>a</sup> Bo Li,<sup>a</sup> Kecheng Cao,<sup>a</sup> Songbai Liu,<sup>a</sup> Min Hou,<sup>a</sup> Shoujian Li,<sup>\*a</sup> and Lijian Ma<sup>\*a</sup>

<sup>a</sup> College of Chemistry, Sichuan University, Key Laboratory of Radiation Physics & Technology, Ministry of Education, Chengdu, 610064, P. R. China.

<sup>b</sup> Nuclear Power Institute of China, Yunke Pharmaceutical Corporation, Chengdu, 610041, P. R. China.

\* Corresponding author at: College of Chemistry, Sichuan University, № 29 Wangjiang Road, Chengdu 610064, P. R. China.

Tel.: +86 28 85412329

Fax: +86 28 85412907

E-mail address: sjli000616@scu.edu.cn (S. Li).

## Experimental Section

### Section 1. Preparation of U(VI) stock solution and multi-ion solution

A stock solution of uranium(VI) ( $\sim 1000 \text{ mg L}^{-1}$ ) was prepared by dissolving appropriate amounts of  $\text{UO}_2(\text{NO}_3)_2 \cdot 6\text{H}_2\text{O}$  in deionized water. The pure uranium working solutions (25–300  $\text{mg L}^{-1}$ ) were prepared by appropriate dilution of the stock solution. Similarly, the multi-ion solution containing 12 competing ions besides U(VI) as listed in Supporting Information, Table S1, was prepared by dissolving the metal oxides or nitrates in nitric acid aqueous solution with the concentration of about  $0.84 \text{ mmol L}^{-1}$ .

## **Section 2.** Batch sorption studies

10 mg HTC-AO was added into a 50 mL Erlenmeyer flask along with 25 mL of either pure uranium solutions or multi-ion test solution at a given pH. The pH of each test solution was adjusted to the required value with dilute and concentrated HNO<sub>3</sub> and NaOH solutions. The flasks were shaken for specified time ( $t$ , min) at desired temperatures ( $T$ , K). Then the sorption systems were centrifuged, and the concentrations of metal ions in the supernatant, before and after sorption, were determined by inductively coupled plasma atomic emission spectroscopy (ICP-AES) or atomic absorption spectroscopy (AAS).

### Section 3. Boehm titrations

A series of Boehm titrations were conducted in order to obtain information about the content of oxygen-containing groups of HTC samples. 20 mL of 0.1 mol L<sup>-1</sup> base solution (NaOH, Na<sub>2</sub>CO<sub>3</sub>, NaHCO<sub>3</sub>) was pipetted slowly into a 250 mL Erlenmeyer flasks containing 0.025 g HTC samples. The Erlenmeyer flasks were sealed and placed in a shaking incubator (25 °C) at 120 rpm for 24 h. Samples were then filtered and 5 mL aliquots were removed along with 50 mL deionized water and titrated with standard HCl (0.1 mol L<sup>-1</sup>), recorded the amount of consumed HCl solution. A blank sample which contained no HTCs was also titrated as described. The following formula was used to calculate the amount of the oxygen-containing groups of HTCs:

$$\text{Mass of SAFG} = \frac{(T_b - T) \times C}{w} \quad (1)$$

Where  $T_b$  (mL) is the amount of consumed hydrochloric acid in the blank titration;  $T$  (mL) are the amount of consumed HCl of different HTCs after oscillation;  $C$  (mol L<sup>-1</sup>) is the concentration of HCl used;  $w$  (g) is the amount of added HTCs. The amount of various types of surface acid groups are calculated under the assumption that NaOH neutralizes carboxylic, phenolic, and lactonic groups; whereas Na<sub>2</sub>CO<sub>3</sub> neutralizes carboxylic and lactonic groups; and NaHCO<sub>3</sub>, only neutralizes carboxylic group.

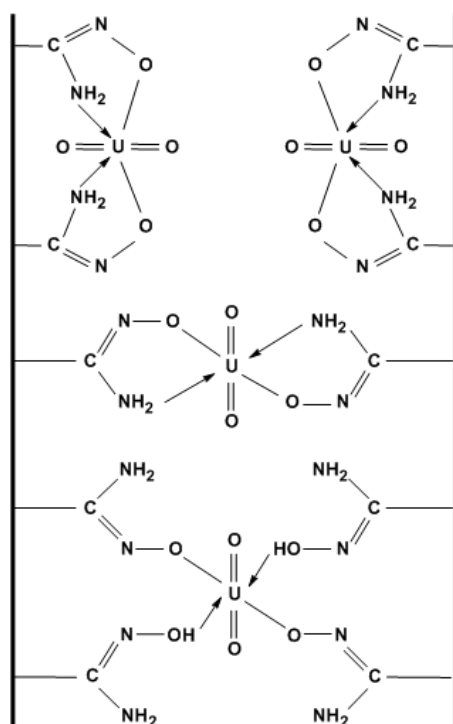

**Scheme S1.** Classic coordination modes between amidoxime groups and uranyl ions.

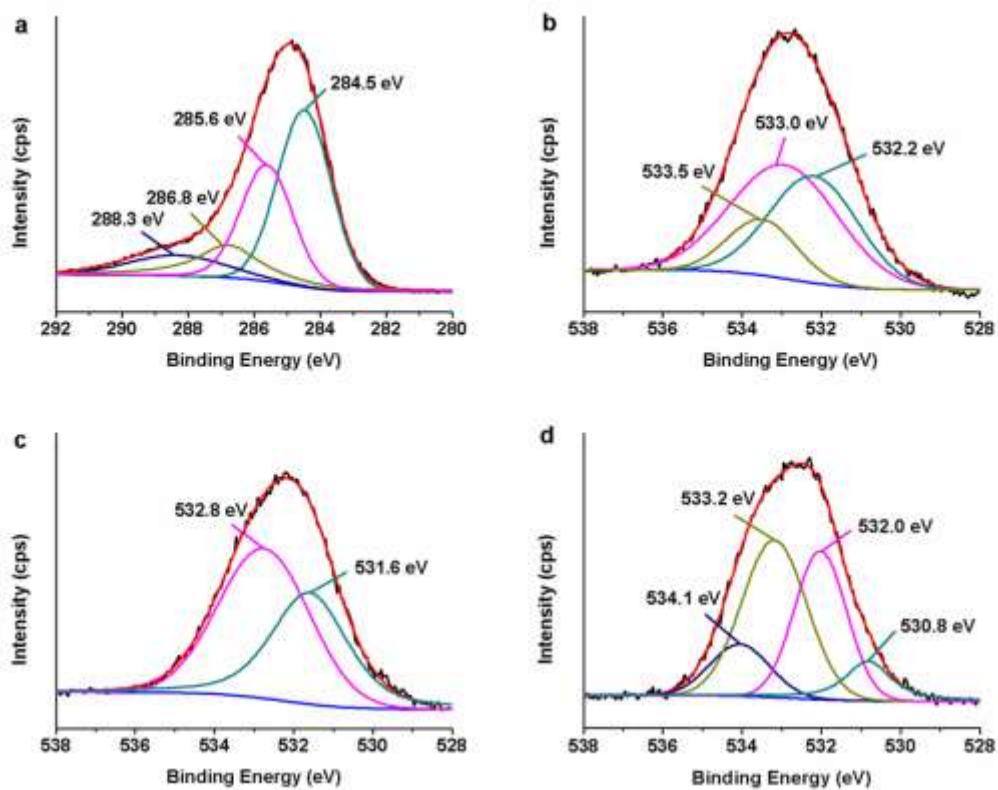

**Figure S1.** The XPS spectra of C 1s for (a) HTC-gly and O 1s for (b) HTC-gly, (c) HTC-CN and (d) HTC-AO.

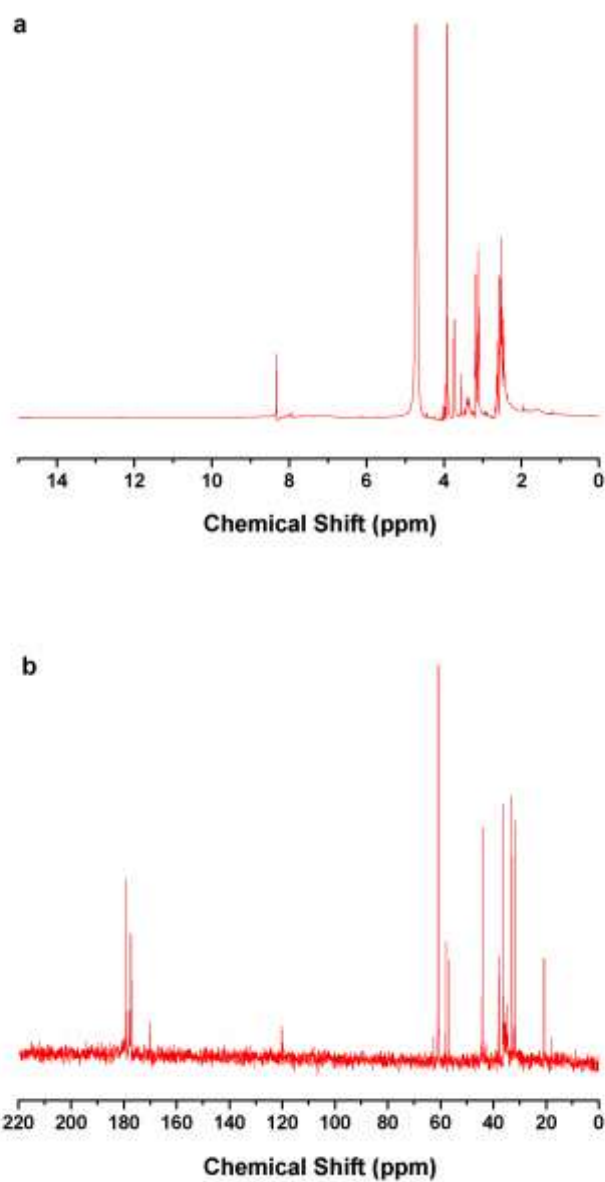

**Figure S2.** (a) Typical  $^1\text{H}$  and (b)  $^{13}\text{C}$  NMR spectra (400 MHz) of reaction solution corresponding to the synthesis process of HTC-gly.

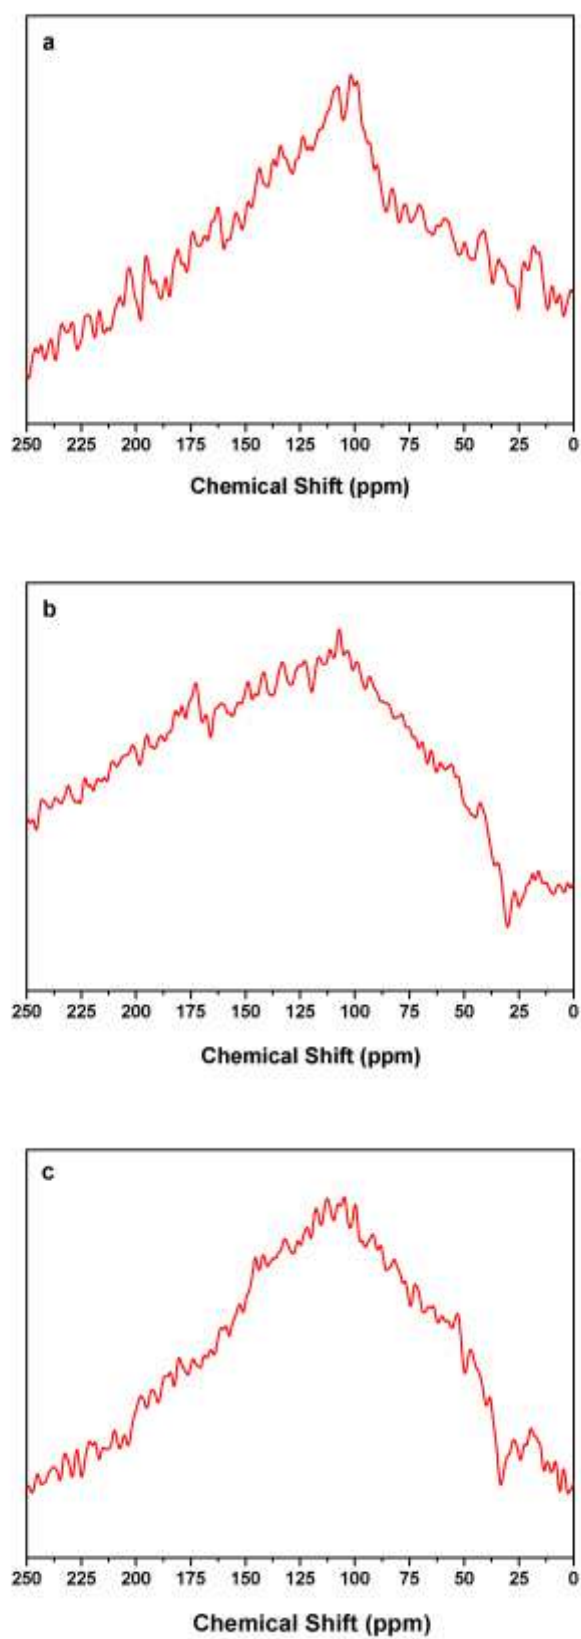

**Figure S3.** The  $^{13}\text{C}$  solid-state CP-MAS NMR spectra (500 MHz) of (a) HTC-gly, (b) HTC-CN, and (c) HTC-AO.



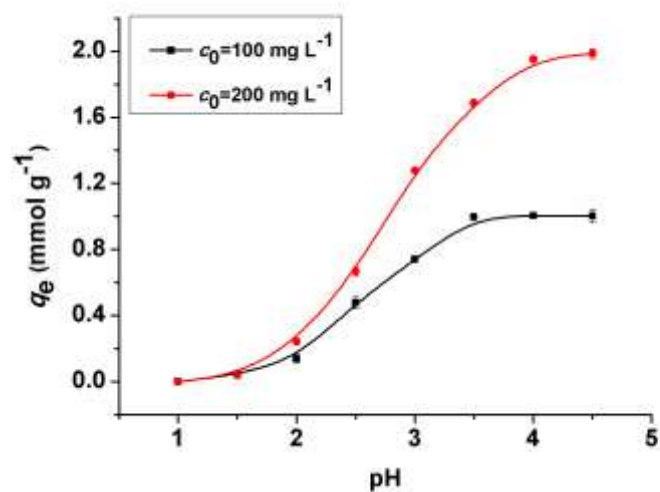

**Figure S4.** Effect of pH on the sorption of U(VI) onto HTC-AO in pure U(VI) solution ( $t = 120 \text{ min}$ ,  $V = 25 \text{ mL}$ ,  $T = 298.15 \text{ K}$ , and  $w = 10 \text{ mg}$ ).

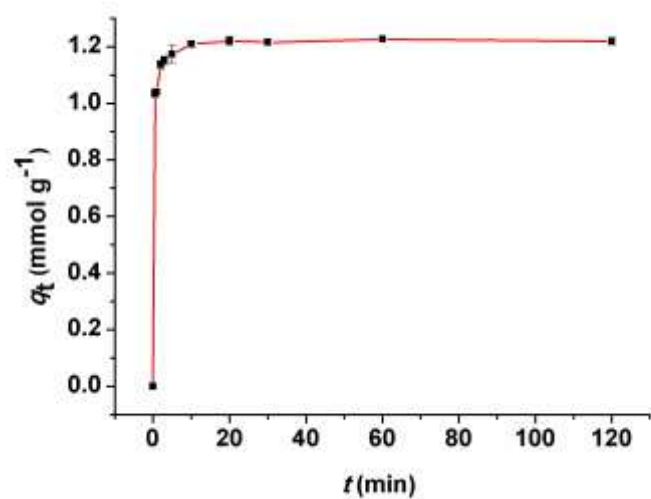

**Figure S5.** The effect of contact time on the sorption of U(VI) onto HTC-AO ( $c_0 = 0.5$  mmol L<sup>-1</sup>, pH = 4.5,  $T = 298.15$  K,  $V = 25$  mL,  $w = 10$  mg).

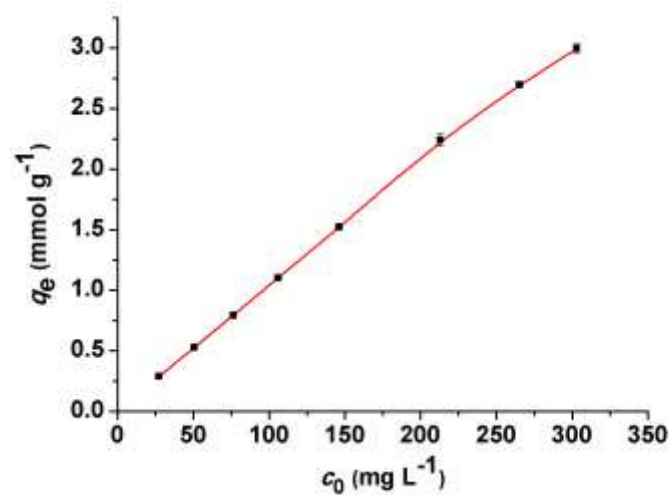

**Figure S6.** The effect of initial uranium concentration on the sorption of U(VI) onto HTC-AO (pH = 4.5,  $t$  = 120 min,  $T$  = 298.15 K,  $V$  = 25 mL,  $w$  = 10 mg).

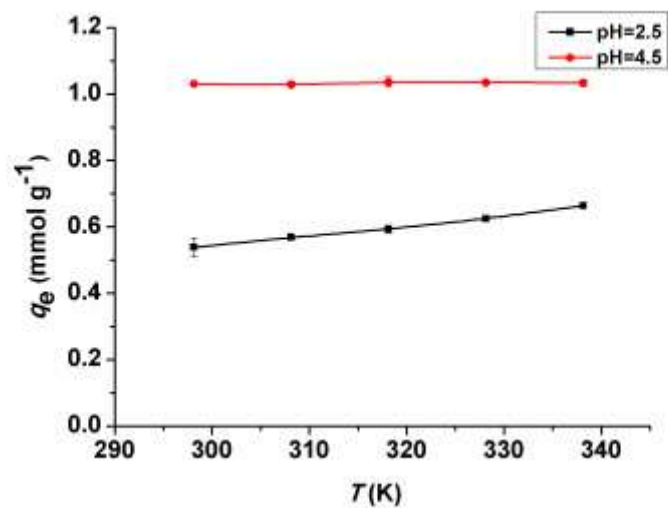

**Figure S7.** The effect of temperature on the sorption of U(VI) onto HTC-AO ( $c_0 = 0.5 \text{ mmol L}^{-1}$ ,  $t = 120 \text{ min}$ ,  $V = 25 \text{ mL}$ ,  $w = 10 \text{ mg}$ ).

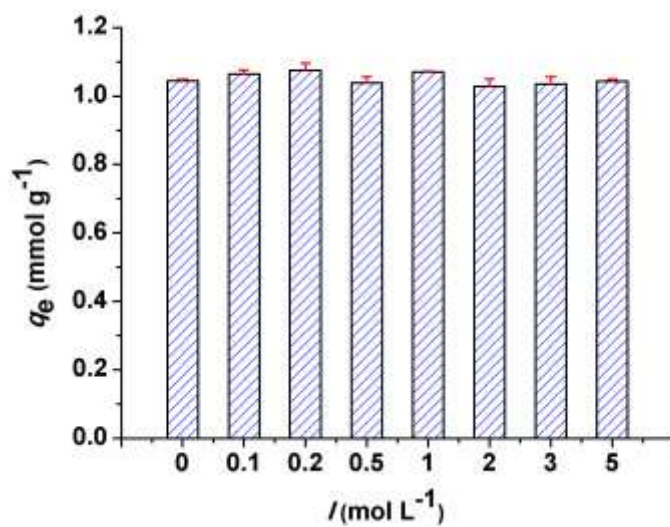

**Figure S8.** The effect of ionic strength on the sorption of U(VI) onto HTC-AO ( $c_0 = 0.5$  mmol L<sup>-1</sup>, pH = 4.5,  $t = 120$  min,  $T = 298.15$  K,  $V = 25$  mL,  $w = 10$  mg).

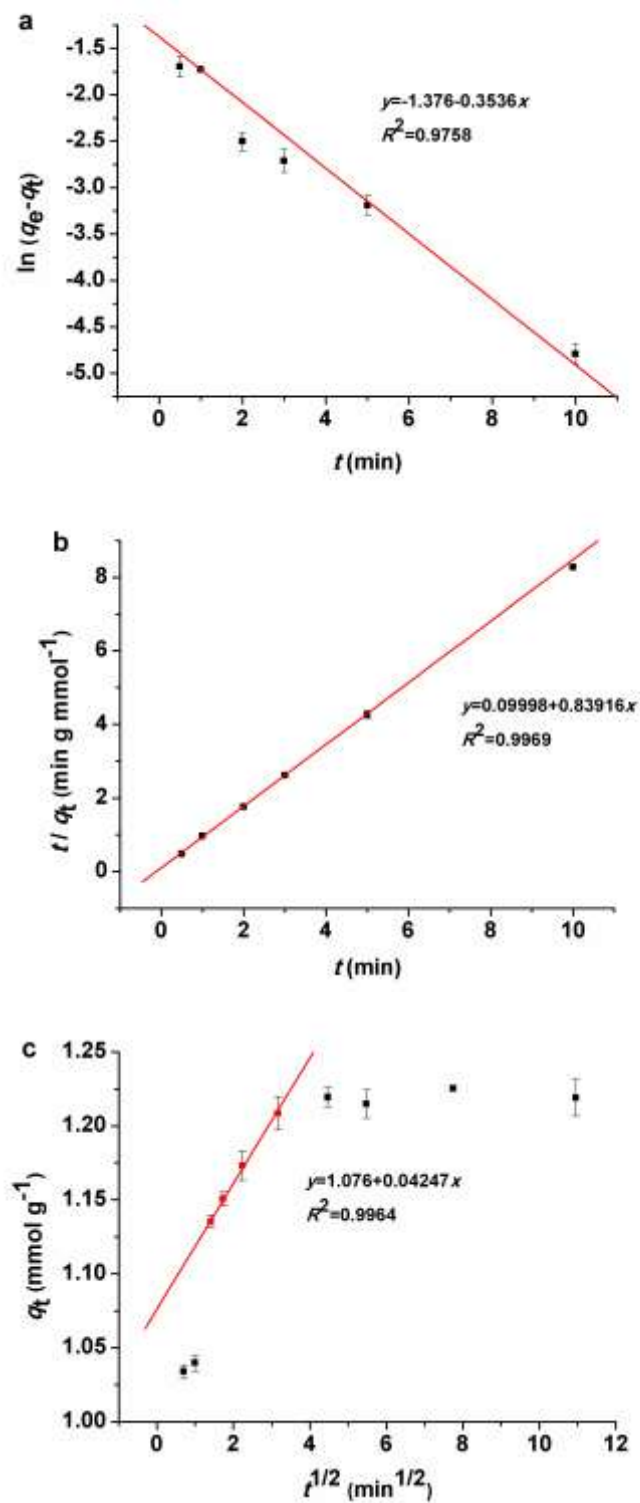

**Figure S9.** (a) Pseudo-first-order, (b) pseudo-second-order and (c) intraparticle diffusion plots for the sorption of U(VI) onto HTC-AO.

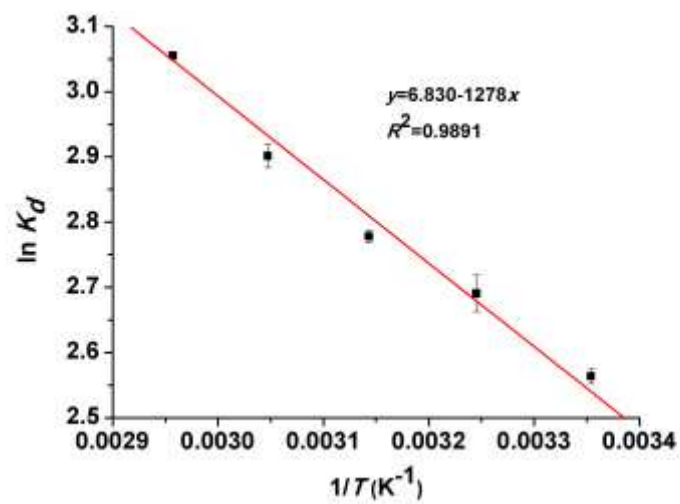

**Figure S10.** Plot of  $\ln K_d$  vs.  $1/T$  for the sorption of U(VI) onto HTC-AO.

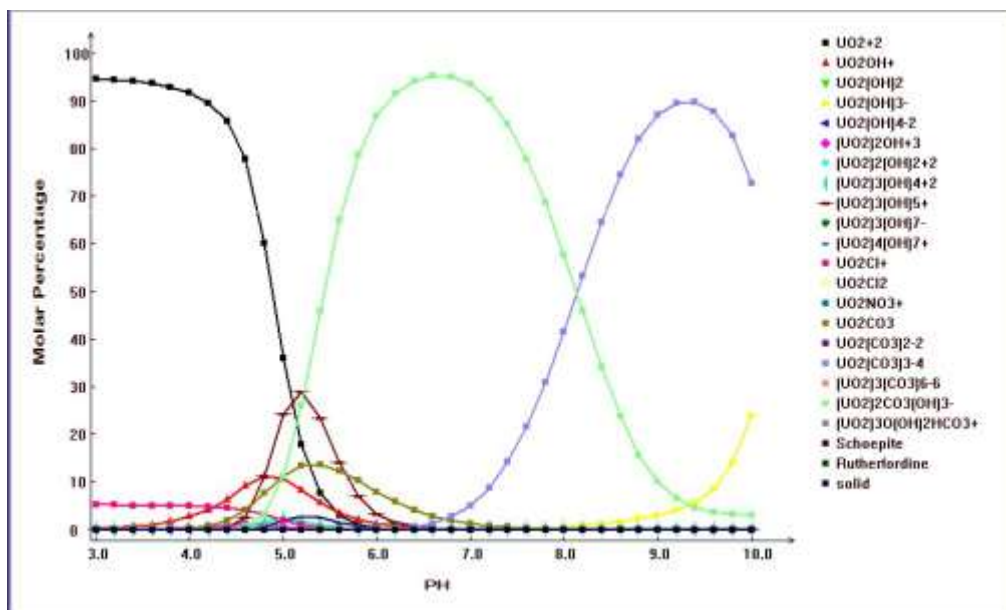

**Figure S11.** Distribution of uranium(VI) species in aqueous solution with a total concentration of  $300 \text{ mg L}^{-1}$  and pH values ranging from 3 to 10. Calculated by using a CHEMSPEC (C++) program.



**Table S1.** Compositions of the simulated nuclear industrial effluent.

| Coexistent ion     | Added as                                               | Reagent purity     |
|--------------------|--------------------------------------------------------|--------------------|
| $\text{UO}_2^{2+}$ | $\text{UO}_2(\text{NO}_3)_2 \cdot 6\text{H}_2\text{O}$ | Standard reagent   |
| $\text{La}^{3+}$   | $\text{La}(\text{NO}_3)_3 \cdot 6\text{H}_2\text{O}$   | 99.9% metal basis  |
| $\text{Ce}^{3+}$   | $\text{Ce}(\text{NO}_3)_3 \cdot 6\text{H}_2\text{O}$   | 99.99% metal basis |
| $\text{Nd}^{3+}$   | $\text{Nd}(\text{NO}_3)_3 \cdot 6\text{H}_2\text{O}$   | AR                 |
| $\text{Sm}^{3+}$   | $\text{Sm}(\text{NO}_3)_3 \cdot 6\text{H}_2\text{O}$   | AR                 |
| $\text{Gd}^{3+}$   | $\text{Gd}(\text{NO}_3)_3 \cdot 6\text{H}_2\text{O}$   | AR                 |
| $\text{Mn}^{2+}$   | MnO                                                    | 99.5%              |
| $\text{Co}^{2+}$   | $\text{Co}(\text{NO}_3)_2 \cdot 6\text{H}_2\text{O}$   | 99.99% metal basis |
| $\text{Ni}^{2+}$   | $\text{Ni}(\text{NO}_3)_2 \cdot 6\text{H}_2\text{O}$   | Spectrum pure      |
| $\text{Zn}^{2+}$   | $\text{Zn}(\text{NO}_3)_2 \cdot 6\text{H}_2\text{O}$   | 99.99% metal basis |
| $\text{Sr}^{2+}$   | $\text{Sr}(\text{NO}_3)_2$                             | 99.99% metal basis |
| $\text{Ba}^{2+}$   | $\text{Ba}(\text{NO}_3)_2$                             | 99.999%            |
| $\text{Cs}^+$      | $\text{CsNO}_3$                                        | AR                 |

**Table S2.** Different experiment conditions for the preparation of the HTC-CN and its sorption capacity and selectivity ( $S_U$ ) toward uranium after oximation.<sup>a, b, c</sup>

| Number | $V_{\text{acrylonitrile}}$<br>(mL) | $V_{\text{H}_2\text{O}}$<br>(mL) | Temperature<br>(°C) | Time<br>(h) | $q_e$<br>(mmol g <sup>-1</sup> ) | $S_U$<br>(%) |
|--------|------------------------------------|----------------------------------|---------------------|-------------|----------------------------------|--------------|
| 1      | 15                                 | 40                               | 160                 | 12          | 1.04                             | 41.6         |
| 2      | 10                                 | 50                               | 160                 | 24          | 1.03                             | 39.8         |
| 3      | 5                                  | 60                               | 160                 | 36          | 0.98                             | 40.6         |
| 4      | 10                                 | 60                               | 180                 | 12          | 1.01                             | 41.2         |
| 5      | 5                                  | 40                               | 180                 | 24          | 0.98                             | 40.2         |
| 6      | 15                                 | 50                               | 180                 | 36          | 0.99                             | 40.6         |
| 7      | 5                                  | 50                               | 200                 | 12          | 1.03                             | 40.4         |
| 8      | 15                                 | 60                               | 200                 | 24          | 0.96                             | 41.5         |
| 9      | 10                                 | 40                               | 200                 | 36          | 0.97                             | 41.4         |

<sup>a</sup>. The volume of acrylonitrile was kept fixed (10 mL) throughout all experiments;

<sup>b</sup>. Oximation condition of HTC-CN: reflux at 115 °C for 6 h in ethanol aqueous solution in the presence of Na<sub>2</sub>CO<sub>3</sub>, pH = 8.0;

<sup>c</sup>. Sorption conditions:  $c_0 = 0.5 \text{ mmol L}^{-1}$  for all cations, pH = 4.5,  $t = 120 \text{ min}$ ,  $V = 25 \text{ mL}$ ,  $T = 298.15 \text{ K}$ , and  $w = 10 \text{ mg}$ .

**Table S3.** The oximation reaction conditions for the preparation of HTC-AO and its sorption capacity and selectivity ( $S_U$ ) toward uranium.<sup>a, b</sup>

| Reaction condition |                  |          | $q_e$ (mmol g <sup>-1</sup> ) | $S_U$ (%) |
|--------------------|------------------|----------|-------------------------------|-----------|
| Temperature (°C)   | Time (h)         | pH       |                               |           |
| 25                 | 6                | 8.0      | 0.80                          | 38.9      |
| 80                 | 6                | 8.0      | 0.84                          | 47.1      |
| 115                | 6                | 8.0      | 0.82                          | 44.4      |
| Time (h)           | Temperature (°C) | pH       |                               |           |
| 3                  | 80               | 8.0      | 1.17                          | 54.2      |
| 6                  | 80               | 8.0      | 0.95                          | 48.2      |
| 18                 | 80               | 8.0      | 0.97                          | 46.7      |
| pH                 | Temperature (°C) | Time (h) |                               |           |
| 6.0                | 80               | 3        | 1.42                          | 54.7      |
| 7.0                | 80               | 3        | 1.56                          | 61.9      |
| 8.0                | 80               | 3        | 1.56                          | 64.0      |
| 9.0                | 80               | 3        | 1.28                          | 53.6      |

<sup>a</sup>. The synthesis condition of HTC-CN: hydrothermal carbonization under 180 °C for 24 h,

$V_{\text{glyoxal}} = 10$  mL,  $V_{\text{acrylonitrile}} = 10$  mL,  $V_{\text{H}_2\text{O}} = 50$  mL;

<sup>b</sup>. Sorption conditions:  $c_0 = 0.5$  mmol L<sup>-1</sup> for all cations, pH = 4.5,  $t = 120$  min,  $V = 25$  mL,  $T = 298.15$  K, and  $w = 10$  mg.

**Table S4.** N<sub>2</sub> adsorption parameters for HTC-gly, HTC-CN and HTC-AO.

| Sample  | Surface area S <sub>BET</sub><br>(m <sup>2</sup> g <sup>-1</sup> ) | Pore volume<br>(cm <sup>3</sup> g <sup>-1</sup> ) | Pore size<br>(nm) |
|---------|--------------------------------------------------------------------|---------------------------------------------------|-------------------|
| HTC-gly | 32.17                                                              | 0.08                                              | 3.34              |
| HTC-CN  | 11.98                                                              | 0.05                                              | 1.31              |
| HTC-AO  | 7.64                                                               | 0.01                                              | 2.86              |

**Table S5.** The kinetic parameters for the U(VI) sorption onto HTC-AO.

| $q_e$ (mmol g <sup>-1</sup> ) | Pseudo-first-order                                    |                                     |        |
|-------------------------------|-------------------------------------------------------|-------------------------------------|--------|
| 1.21                          | $k_1$ (min <sup>-1</sup> )                            | $q_{e,cal}$ (mmol g <sup>-1</sup> ) | $R^2$  |
|                               | 0.354                                                 | 0.253                               | 0.9758 |
|                               | Pseudo-second-order                                   |                                     |        |
|                               | $k_2$ (g mg <sup>-1</sup> min <sup>-1</sup> )         | $q_{e,cal}$ (mmol g <sup>-1</sup> ) | $R^2$  |
|                               | 7.04                                                  | 1.19                                | 0.9969 |
|                               | Intraparticle diffusion                               |                                     |        |
|                               | $k_{int}$ (mmol g <sup>-1</sup> min <sup>-0.5</sup> ) | $C$ (mmol g <sup>-1</sup> )         | $R^2$  |
|                               | 0.0425                                                | 1.08                                | 0.9964 |

**Table S6.** Thermodynamic parameters for the U(VI) sorption onto HTC-AO.

| $\Delta H$<br>(kJ mol <sup>-1</sup> ) | $\Delta S$<br>(J mol <sup>-1</sup> K <sup>-1</sup> ) | $\Delta G$ (kJ mol <sup>-1</sup> ) |          |          |          |          |
|---------------------------------------|------------------------------------------------------|------------------------------------|----------|----------|----------|----------|
|                                       |                                                      | 298.15 K                           | 308.15 K | 318.15 K | 328.15 K | 338.15 K |
| 10.10                                 | 112.6                                                | -23.48                             | -24.60   | -25.73   | -26.86   | -27.98   |
